# Supplementary material for: Robust and durable triboelectric nanogenerators enabled by a mechanically strong and mildly healable polymer
Source: Royal Society of Chemistry journal article supplement (doi:10.1039/d3ta02340k), 2023-01-01
Supplement: d3ta02340k1.pdf [file d3ta02340k1.pdf]

## Supporting Information

Robust and durable triboelectric nanogenerators enabled by a mechanically strong and mildly healable polymer

Wei Xu, Hongzhen Liu, Man-chung Wong, Huimin He, Jianhua Hao, Lizhi Xu\*

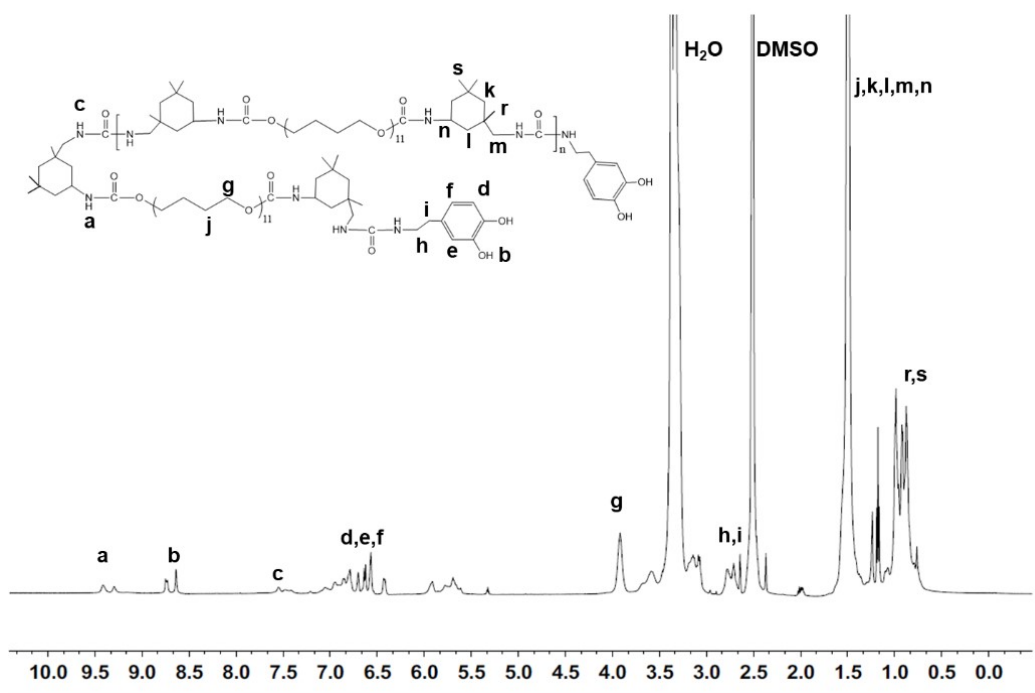

Figure S1. The result of NMR of DA-prepolymer. Here the chemical shifts at 6.5-6.9 ppm and 8.6–8.8 ppm are related to protons on catechol groups. This confirms that catechol groups were successfully introduced into the DA-prepolymer structure. The chemical shifts at 5.6-5.9 ppm belong to protons on RNH<sub>2</sub> from the side reaction between NCO and water.

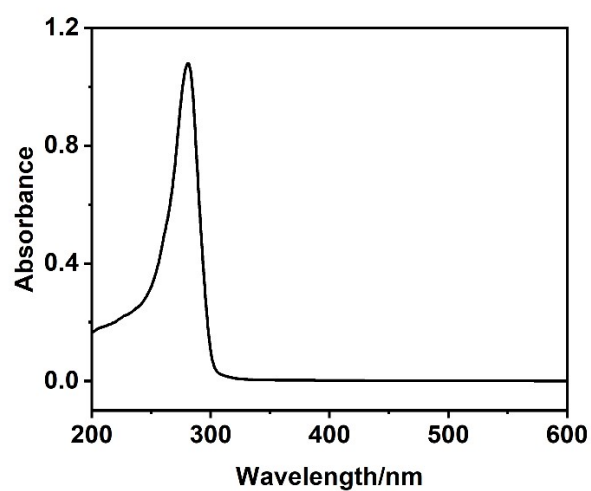

Figure S2. UV-VIS absorption spectroscopy of DA-prepolymer. Here the absorption peak at 280 nm is related to catechol groups.

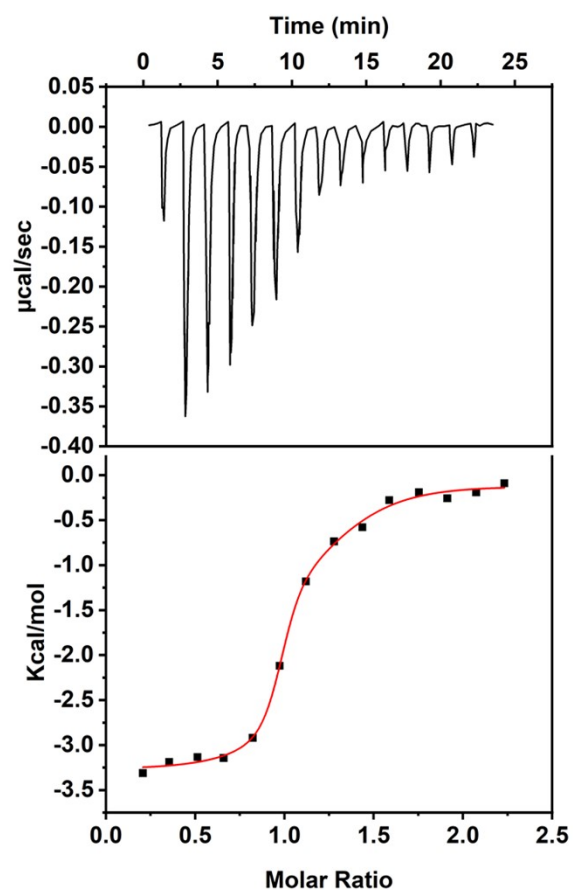

Figure S3. isothermal titration calorimetry (ITC) evaluation on the coordination between calcium ions and catechol. Here  $K_d$  is measured as  $0.5 \mu\text{M}$ .

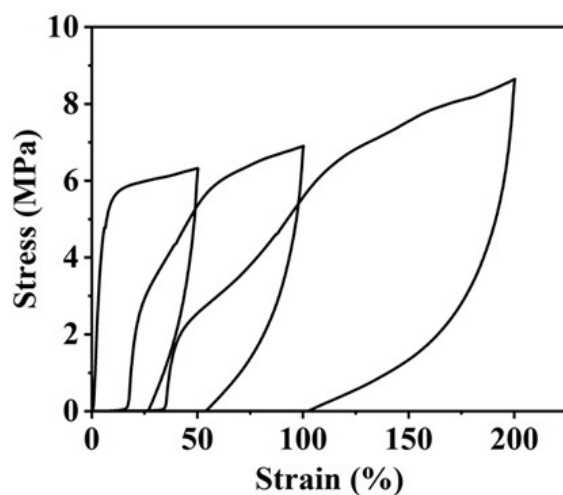

Figure S4. Continuous tensile cycle of THP ( $C_{Ca}=28\%$ ) with gradually increased strain (50%, 100% and 200%).

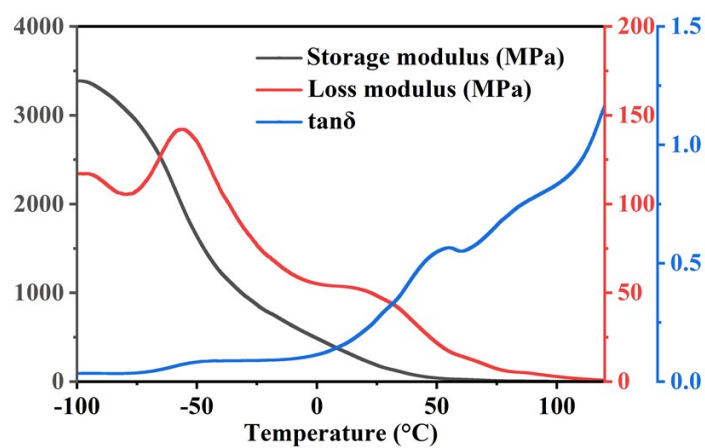

Figure S5. The result of Dynamic Mechanical Analysis (DMA) of THP ( $C_{Ca}=28\%$ ).

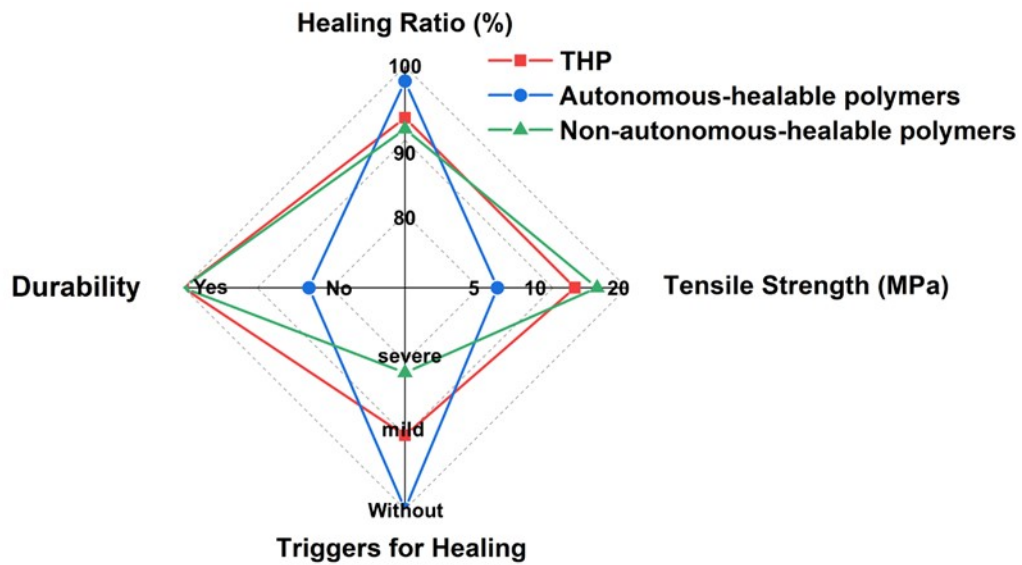

Figure S6. Comparison of the comprehensive performances between THP and other reported healable polymers.

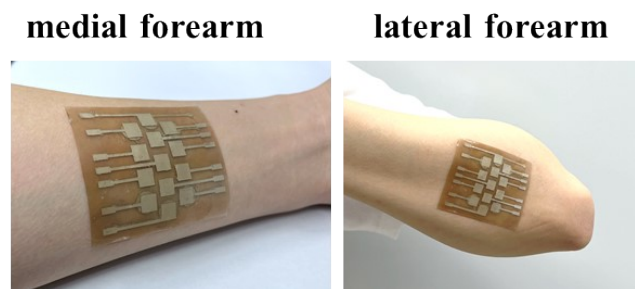

Figure S7. Two THP-TENG-based sensors attached on the medial (left) and lateral (right) forearm.
